# Supplementary material for: Adiponectin Controls Nutrient Availability in Hypothalamic Astrocytes
Source: PubMed Central journal article supplement (PMC7915184; doi:10.3390/ijms22041587), 2021-02-04
Supplement: ijms-22-01587-s001.pdf [file ijms-22-01587-s001.pdf]

## Supplementary Figure 1

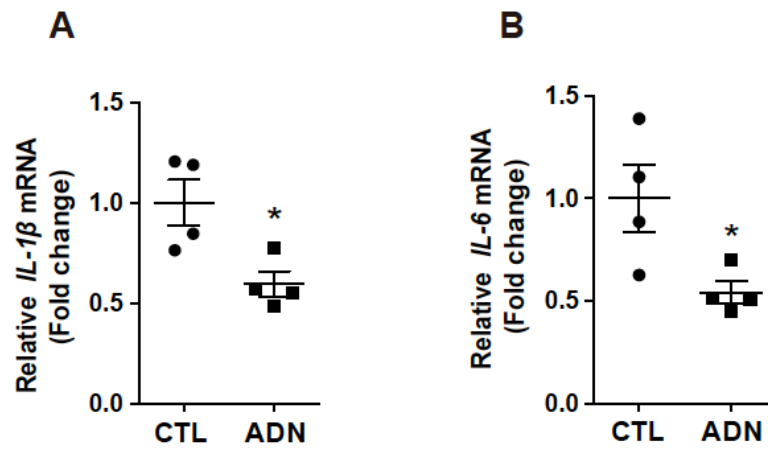

**Supplementary Figure 1. Adiponectin leads to decreased mRNA levels of proinflammatory cytokines in primary astrocytes.** Primary astrocytes were seeded at  $5 \times 10^5$  cell/well, starved overnight, and treated with adiponectin (1  $\mu$ g/ml) for 24 h. The reduced levels of mRNA encoding (A) *interleukin-1 $\beta$*  (*IL-1 $\beta$* ) and (B) *interleukin-6* (*IL-6*) genes were observed in adiponectin-treated primary astrocyte as determined by qRT-PCR. Results are presented as the means  $\pm$  SEM, \* $P < 0.05$ .
